# Supplementary material for: Protocol for Facile Synthesis of Fmoc-N-Me-AA-OH Using 2-CTC Resin as Temporary and Reusable Protecting Group
Source: MDPI journal article supplement (doi:10.3390/mps6060110), 2023-11-13
Supplement: s1 [file s1]

## **Supplementary Information**

### **Facile Synthesis of Fmoc-N-Me-AA-OH using CTC resin as Temporary Protecting Group**

Tanya Román 1,2,3, Gerardo Acosta 3,4, Constanza Cárdenas 1, Beatriz G. de la Torre 5, Fanny Guzmán 1,\* and Fernando Albericio 3,4,6,\*

1. Núcleo Biotecnología Curauma, Pontificia Universidad Católica de Valparaíso, Valparaíso 2373223, Chile; tanya.roman.21@gmail.com (T.R.); constanza.cardenas@pucv.cl (C.C.)

2. Doctorado en Biotecnología, Pontificia Universidad Católica de Valparaíso, Universidad Técnica Federico Santa María, Valparaíso 2373223, Chile

3. Department of Organic Chemistry and CIBER-BBN, Networking Centre on Bioengineering, Biomaterials and Nanomedicine, University of Barcelona, 08028 Barcelona, Spain; gerardoacosta@ub.edu

4. Institute for Advanced Chemistry of Catalonia (IQAC-CSIC), Jordi Girona 18-26, 08034 Barcelona, Spain

5. KwaZulu-Natal Research Innovation and Sequencing Platform (KRISP), School of Laboratory Medicine and Medical Sciences, College of Health Sciences, University of KwaZulu-Natal, Durban 4041, South Africa; garciadelatorreb@ukzn.ac.za; (B.G.d.l.T)

6. School of Chemistry and Physics, University of KwaZulu-Natal, Durban 4001, South Africa

\*Correspondence: fanny.guzman@pucv.cl (F.G.); albericio@ub.edu (F.A.)

**Table S1:** ESI-MS analysis of Fmoc-N-Me-βAla-OH and Fmoc-N-Me-Thr(tBu)-OH with first activation of CTC resin using dimethyl sulfate and iodomethane, both as N-methylation reagents. A) Analysis of mini-cleavage after *o*-NBS deprotection. B) Analysis of mini-cleavage after Fmoc protection.

| Fmoc-N-Me-AA-OH synthesis with first activation of CTC resin |                         |                         |
|--------------------------------------------------------------|-------------------------|-------------------------|
|                                                              | Dimethyl sulfate        | Iodomethane             |
| A) <i>o</i> -NBS deprotection                                | 1-H-N-Me-βAla-OH        | 2-H-N-Me-βAla-OH        |
|                                                              |                         |                         |
|                                                              | 3-H-N-Me-Thr(tBu)-OH    | 4-H-N-Me-Thr(tBu)-OH    |
|                                                              |                         |                         |
| B) Fmoc protection                                           | 1-Fmoc-N-Me-βAla-OH     | 2-Fmoc-N-Me-βAla-OH     |
|                                                              |                         |                         |
|                                                              | 3-Fmoc-N-Me-Thr(tBu)-OH | 4-Fmoc-N-Me-Thr(tBu)-OH |
|                                                              |                         |                         |

**Table S2:** ESI-MS analysis of Fmoc-N-Me-βAla-OH and Fmoc-N-Me-Thr(tBu)-OH with second activation of CTC resin using dimethyl sulfate and iodomethane, both as N-methylation reagents. A) Analysis of mini-cleavage after *o*-NBS protection and N-methylation. B) Analysis of mini-cleavage after *o*-NBS deprotection. C) Analysis of mini-cleavage after Fmoc protection.

| Fmoc-N-Me-AA-OH synthesis with second activation of CTC resin |                          |                          |
|---------------------------------------------------------------|--------------------------|--------------------------|
|                                                               | Dimethyl sulfate         | Iodomethane              |
| A) <i>o</i> -NBS protection and N-methylation                 | R1-Ns-N-Me-βAla-OH       | R2-Ns-N-Me-βAla-OH       |
|                                                               |                          |                          |
|                                                               | R3-Ns-N-Me-Thr(tBu)-OH   | R4-Ns-N-Me-Thr(tBu)-OH   |
|                                                               |                          |                          |
| B) <i>o</i> -NBS deprotection                                 | R1-H-N-Me-βAla-OH        | R2-H-N-Me-βAla-OH        |
|                                                               |                          |                          |
|                                                               | R3-H-N-Me-Thr(tBu)-OH    | R4-H-N-Me-Thr(tBu)-OH    |
|                                                               |                          |                          |
| C) Fmoc protection                                            | R1-Fmoc-N-Me-βAla-OH     | R2-Fmoc-N-Me-βAla-OH     |
|                                                               |                          |                          |
|                                                               | R3-Fmoc-N-Me-Thr(tBu)-OH | R4-Fmoc-N-Me-Thr(tBu)-OH |
|                                                               |                          |                          |

R1-Fmoc-N-Me-βAla-OH

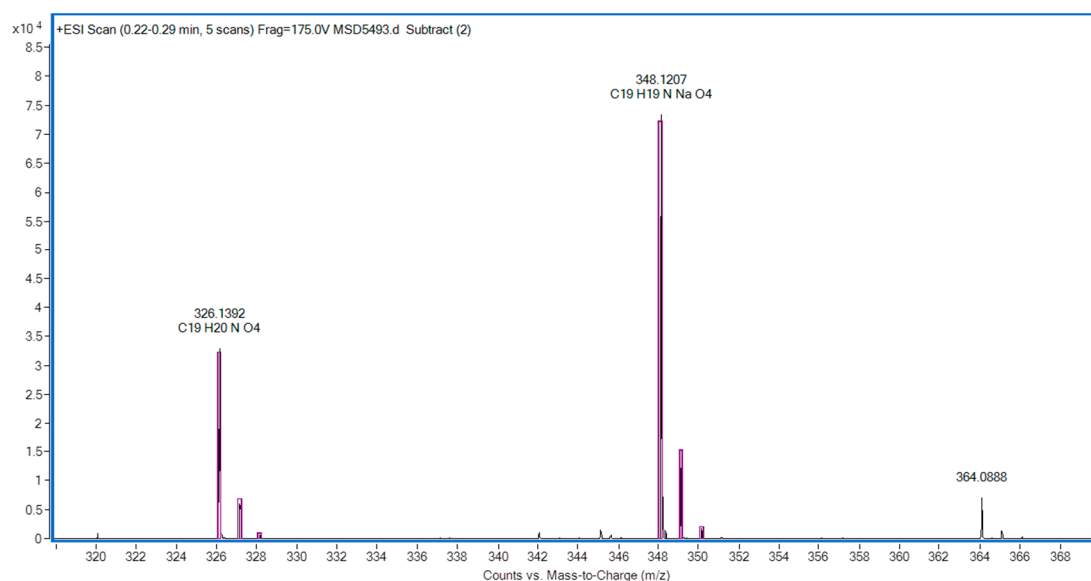

**Figure S1:** ESI-TOF analysis of Fmoc-N-Me-βAla-OH using dimethyl sulfate as N-methylation reagent.

#### R2-Fmoc-N-Me-βAla-OH

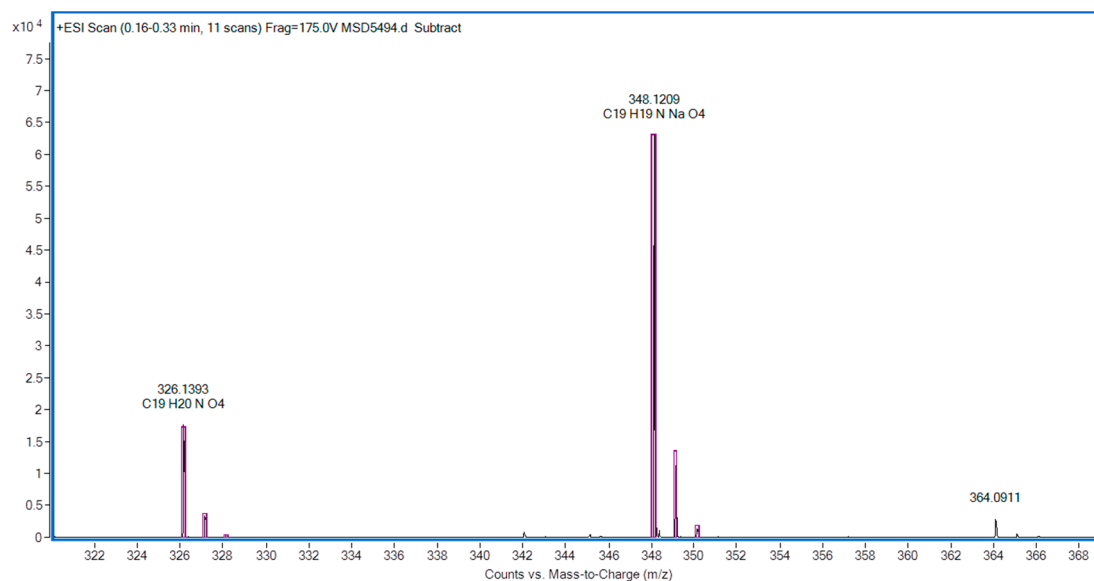

**Figure S2:** ESI-TOF analysis of Fmoc-N-Me-βAla-OH using iodomethane as N-methylation reagent.

### R3-Fmoc-N-Me-Thr(tBu)-OH

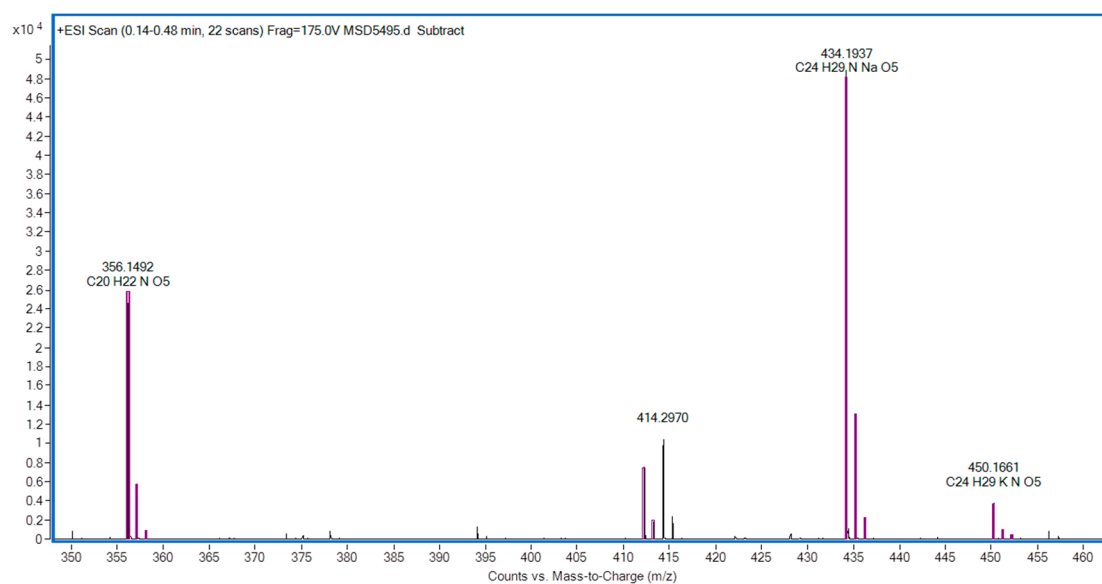

**Figure S3:** ESI-TOF analysis of Fmoc-N-Me-Thr(tBu)-OH using dimethyl sulfate as N-methylation reagent.

### R4-Fmoc-N-Me-Thr(tBu)-OH

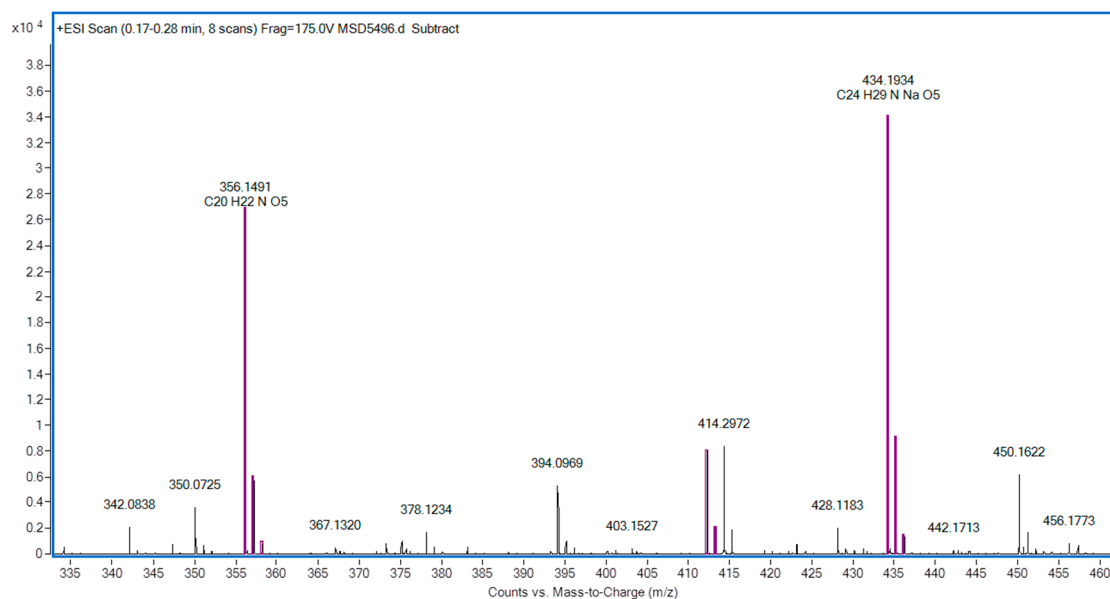

**Figure S4:** ESI-TOF analysis of Fmoc-N-Me-Thr(tBu)-OH using iodomethane as N-methylation reagent.

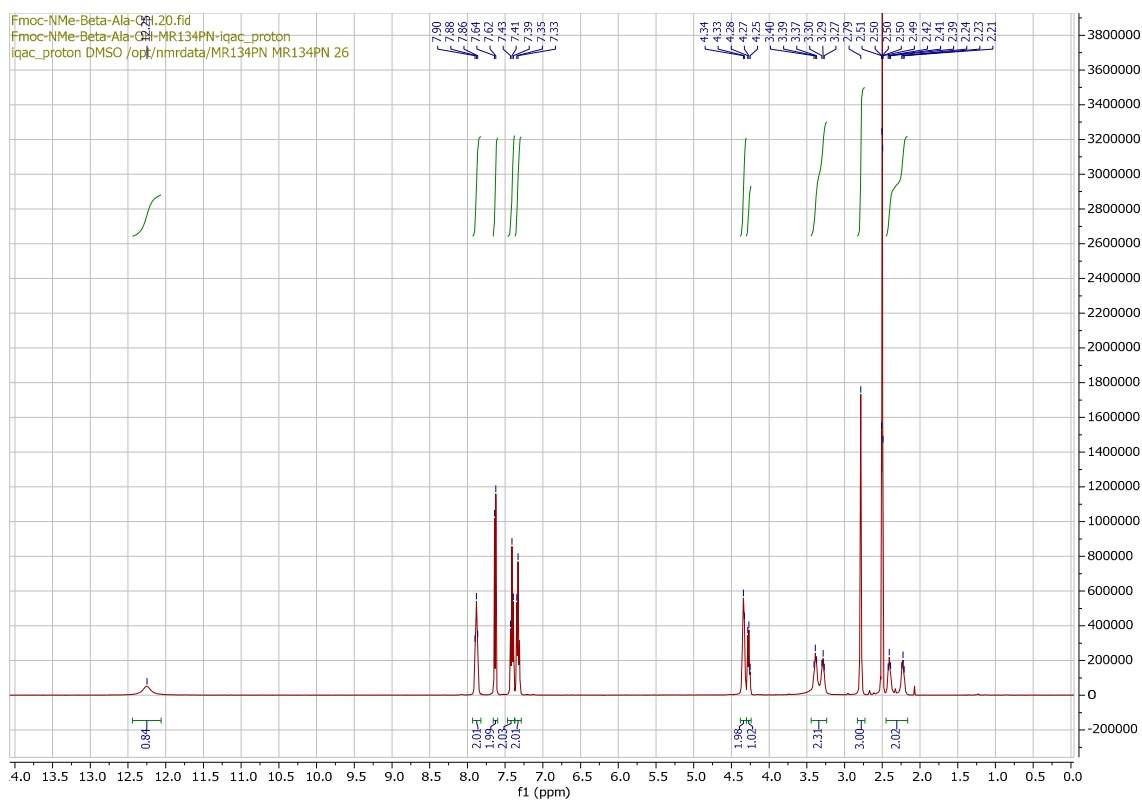

Figure S5: NMR  $^1\text{H}$  spectrum of Fmoc-N-Me- $\beta$ Ala-OH at 400 MHz in DMSO( $d_6$ ).

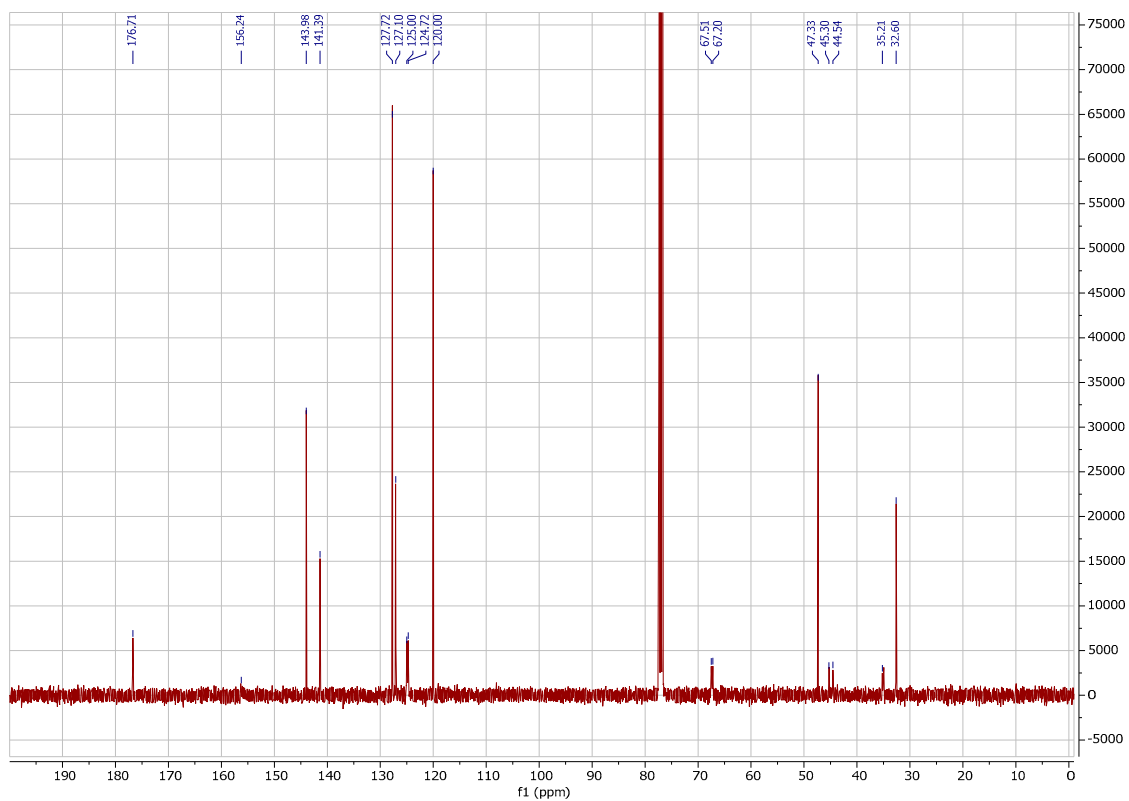

Figure S6: NMR  $^{13}\text{C}$  spectrum of Fmoc-N-Me- $\beta$ Ala-OH at 400 MHz in  $\text{CDCl}_3$ .

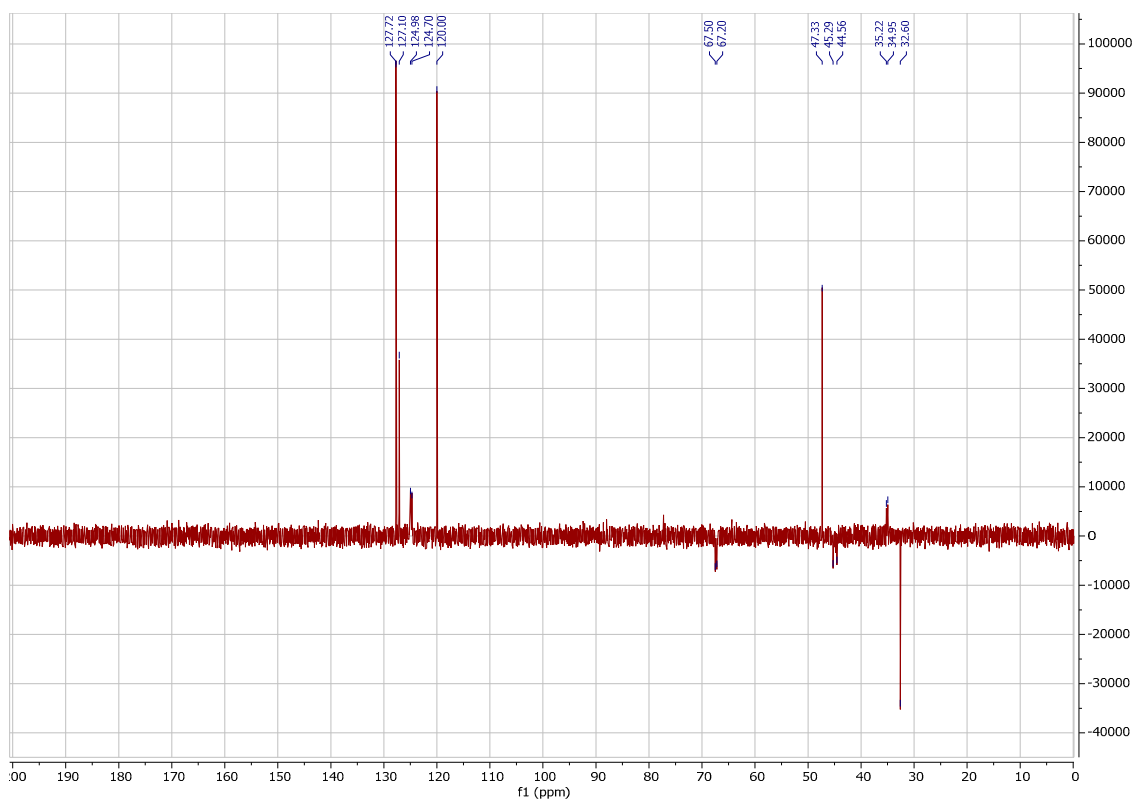

**Figure S7:** NMR DEP 135 spectrum of Fmoc-N-Me- $\beta$ Ala-OH at 400 MHz in  $\text{CDCl}_3$ .

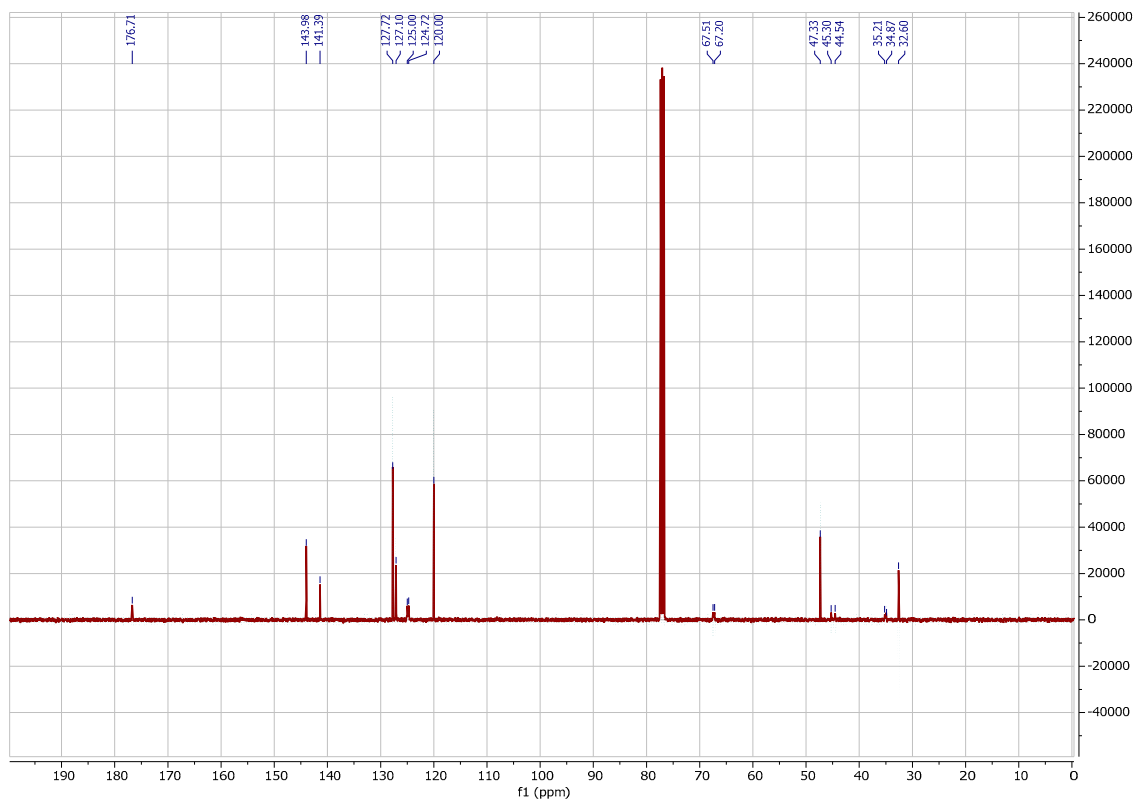

**Figure S8:** Overlaid  $^{13}\text{C}$  and DEP 135 spectra of Fmoc-N-Me- $\beta$ Ala-OH at 400 MHz in  $\text{CDCl}_3$ .

**Figure S9:** NMR  $^1\text{H}$  spectrum of Fmoc-N-Me-Thr(tBu)-OH at 400 MHz in DMSO( $d_6$ ).

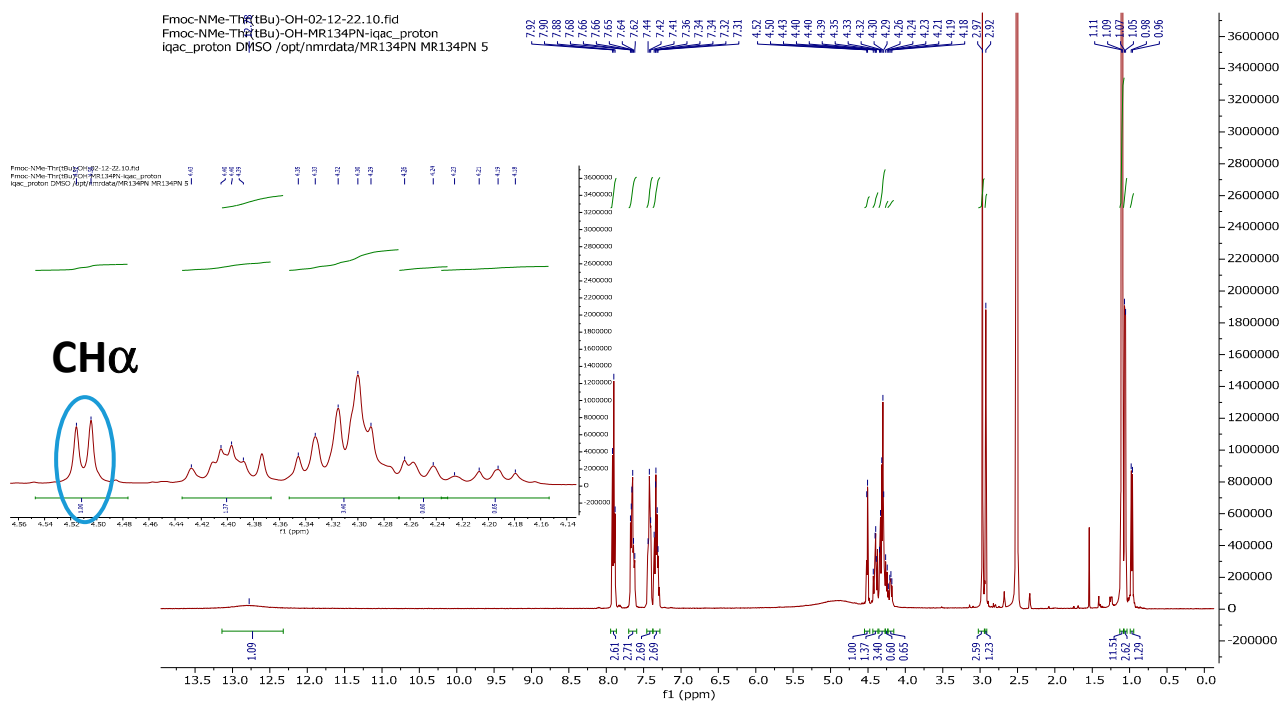

**Figure S10:** NMR  $^1\text{H}$  spectrum of Fmoc-NMe-Thr(tBu)-OH enlarged aliphatic zone.



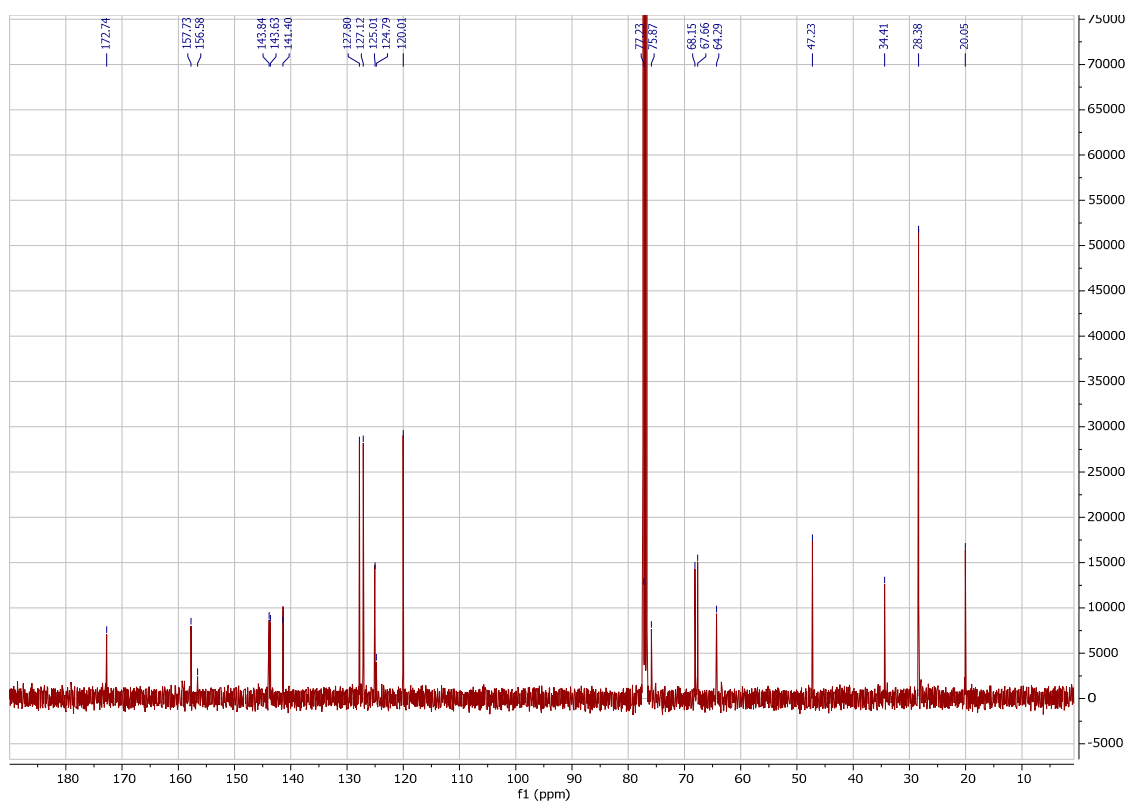

Figure S11: NMR  $^{13}\text{C}$  spectrum of Fmoc-N-Me-Thr(tBu)-OH at 400 MHz in  $\text{CDCl}_3$ .

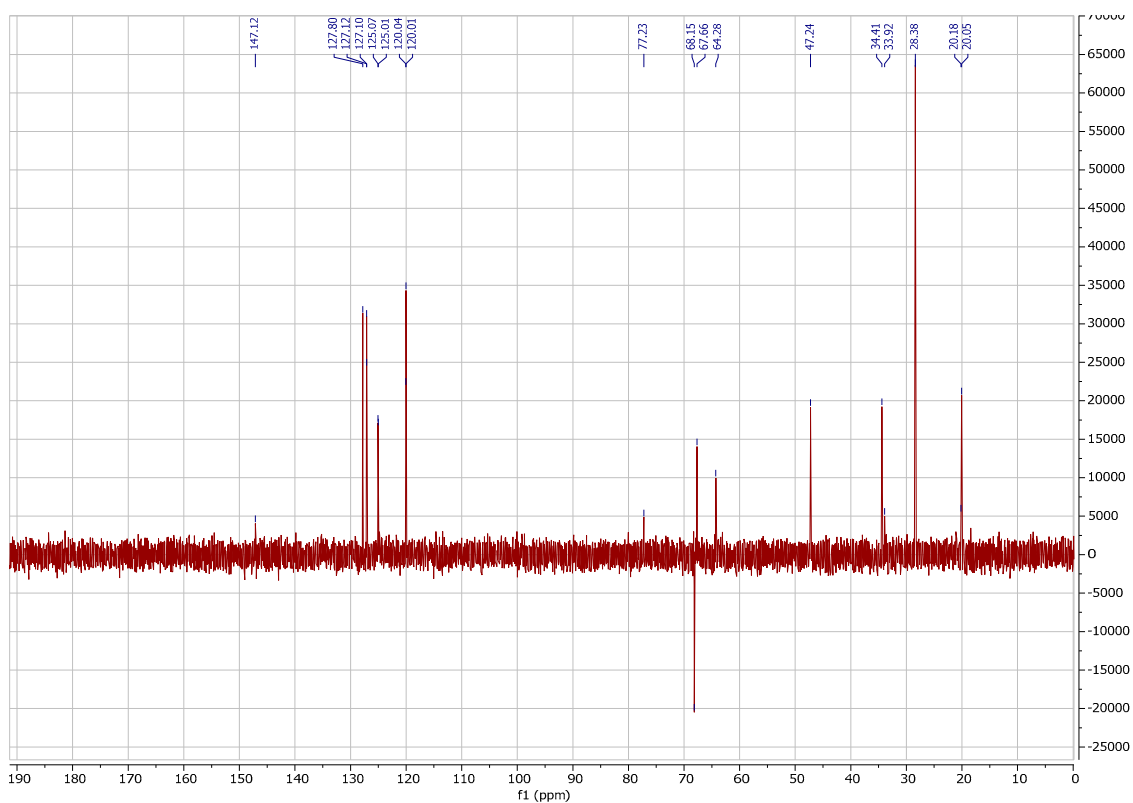

Figure S12: NMR DEP 135 spectrum of Fmoc-N-Me-Thr(tBu)-OH at 400 MHz in  $\text{CDCl}_3$ .

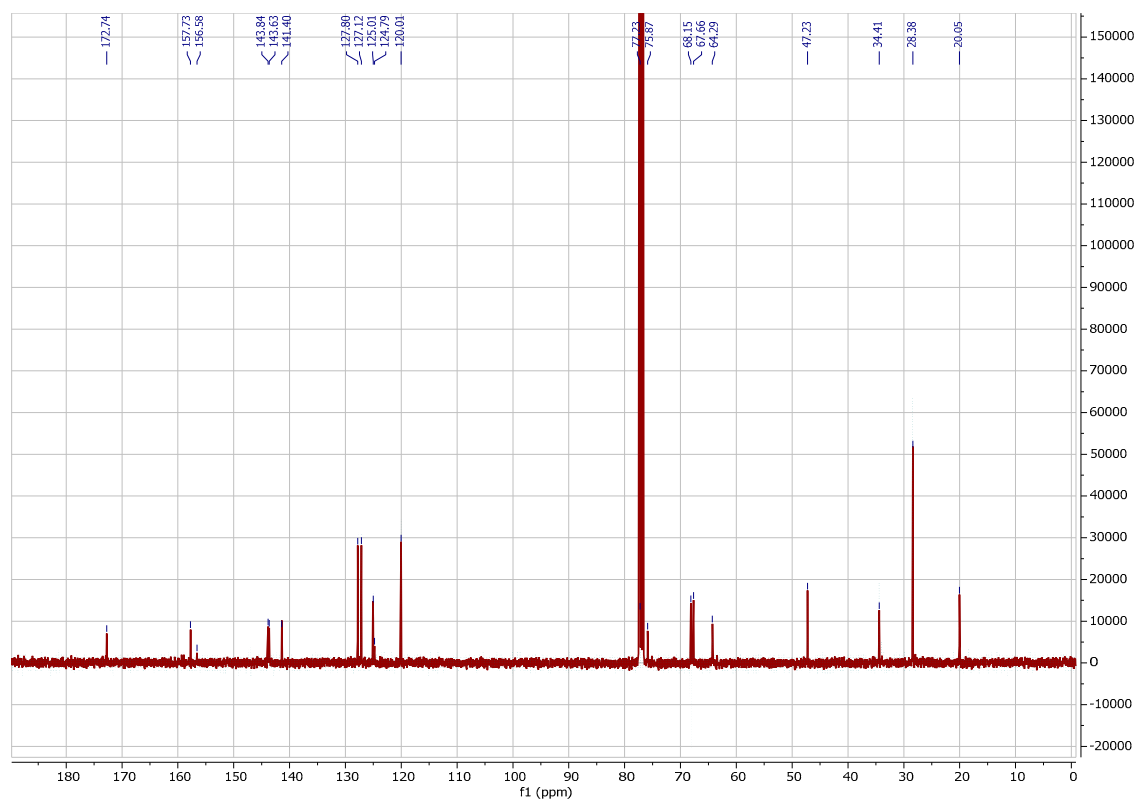

**Figure S13:** Overlaid <sup>13</sup>C and DEP 135 spectra of Fmoc-N-Me-Thr(tBu)-OH at 400 MHz in CDCl<sub>3</sub>.
